# Supplementary material for: Resveratrol reduces brain injury after subarachnoid hemorrhage by inhibiting oxidative stress and endoplasmic reticulum stress
Source: PubMed Central journal article supplement — Neural Regen Res. 2019 Oct;14(10):1734–42. doi: 10.4103/1673-5374.257529 (PMC6585540; doi:10.4103/1673-5374.257529), 2019-10
Supplement: NRR-14-1734_Suppl1.pdf [file NRR-14-1734_Suppl1.pdf]

## OPEN PEER REVIEW REPORT 1

**Name of journal:** Neural Regeneration Research

**Manuscript NO:** NRR-D-18-00349

**Title:** The neuroprotection of resveratrol in subarachnoid hemorrhage: oxidative stress, ER stress and neuroinflammation

**Reviewer's Name:** Lijie Zhai

**Reviewer's country:** USA

**Date sent for review:** 2018-05-26

**Date reviewed:** 2018-06-07

**Review time:** 12 days

### COMMENTS TO AUTHORS

Strength: well-designed experiment and clear data presentation; well written in English

Weakness: data image resolution is low

In current study, the authors investigated the neural protective effects and underlying molecular mechanisms of resveratrol (Res) in subarachnoid hemorrhage (SAH)-induced early brain injury (EBI). By dissecting the oxidative stress- and endoplasmic reticulum (ER) stress-associated signaling pathways, this work demonstrated that Res exerts neuroprotection against SAH by decreasing oxidative damage, ER stress and attenuating neuroinflammation.

Overall, this manuscript is well written. The experiments are scientifically designed with rigorous statistical analysis. Data presentation and interpretation are clear and accurate. Considering the potential significance of current study in clinical therapy of SAH.
